# Supplementary material
Source: PubMed Central journal article supplement (PMC6029546)
Supplement: 2017_186908-Disclosures_and_Contributions.pdf [file 2017_186908-Disclosures_and_Contributions.pdf]

Haematologica  
HAEMATOL/2017/186908  
Version 3  
Ibrutinib Withdrawal Symptoms in Patients with Waldenström  
Macroglobulinemia

Jorge J. Castillo, Joshua N. Gustine, Kirsten Meid, Toni Dubeau,  
Patricia Severns, and Steven P. Treon

Disclosures: JJC has received honoraria and/or research funds from Abbvie, Gilead, Janssen, Millennium and Pharmacyclics. SPT has received honoraria and/or research funds from Pharmacyclics.

Contributions: JJC, JNG and SPT designed the study. JJC performed the analysis and drafted the manuscript. All the authors took care of the patients, gathered the data, and critically reviewed and approved the final manuscript.
